# Supplementary material
Source: publisher figshare collection journal article supplement (https://frontiersin.figshare.com/ndownloader/files/25766219)
Supplement: Supplementary file 1 [file 25766219]

## Sheet: Appendix 1
First Auth	Yr published	Country	Yr undertaken (if diff)	Publication type	Population type	Funding?	CoI?	Neutral invitation?	Justification of Research Method	Background Lit review	Explict Research question	Clear Study objectives	Methods for data anaylsis	Questionaire administration	Location of Data collection	Date of data collection	Replication	General Validity	Validity 1	Validity 2	Verifying	Description	Pre testing	Consent	Sponsorship	Ethics approval	Ethical treatment	Sampling Method	Target Population Number	Sampled	N	Ave teaching exp	Response Rate	Matching instruction; specific q asked	# incorrect	# correct	# Don't know/neutral	% incorrect	% correct	% Don't know/neutral	Training?	N	# incorrect (post)	# correct (post)	# DK/neutral (post)	% incorrectn (post)	% correct (post)	% don't know (post)	Use Learning Styles?
Betts	2019	Worldwide	2019	Grey lit	Higher Education	OLC	N	-	Y	Y	Y	Y	Y	Y	Y	N	Y	Y	N	N	Y	Y	N	Y	Y	Y	Y	Sno	-	-	427	-	-	Individuals learn better when they receive information in their preferred learning style (e.g., auditory, visual, kinesthetic).	277.55	111.02	38.43	65	26	9	-	-	-	-	-	-	-	-	-
Bailey	2018	UK + Ireland	2017	Journal	Sports Coaches	-	N	-	Y	Y	Y	Y	Y	Y	Y	N	Y	N	N	N	Y	Y	N	Y	N	Y	Y	Con	-	545	545	-	-	Individuals learn better when they receive information in their preferred learning style (e.g., auditory, visual, or kinesthetic)	337.9	175.49	29.975	62	32.2	5.5	-	-	-	-	-	-	-	-	-
Carter	2015	Australia	2015	Journal	Pre-service teachers	-	N	-	Y	Y	Y	Y	Y	Y	Y	N	Y	Y	Y	Y	Y	Y	N	Y	N	Y	Y	Con	3193	300	235	0	7.35985	-	-	-	-	-	-	-	-	-	-	-	-	-	-	-	Yes
Dandy	2014	USA	2014	Journal	Higher Education	Georgia College Office	N	-	Y	Y	Y	Y	Y	Y	Y	N	Y	Y	Y	Y	Y	Y	Y	Y	Y	N	N	Con	-	-	81	-	-	Does Teaching to a Student’s Learning Style Enhance Learning?	51.84	17.82	11.34	64	22	14	-	-	-	-	-	-	-	-	-
Dekker	2012	UK	2012	Journal	Teachers (mixed)	-	N	Y	Y	Y	Y	Y	Y	Y	Y	N	Y	Y	N	N	Y	Y	N	Y	N	Y	Y	Con	-	137	137	-	-	Individuals learn better when they receive information in their preferred learning style (e.g., auditory, visual, kinesthetic).	127.41	5.48	4.11	93	4	3	-	-	-	-	-	-	-	-	-
Dekker	2012	Netherlands	2012	Journal	Teachers (mixed)	-	N	Y	Y	Y	Y	Y	Y	Y	Y	N	Y	Y	N	N	Y	Y	N	Y	N	Y	Y	Con	-	105	105	-	-	Individuals learn better when they receive information in their preferred learning style (e.g., auditory, visual, kinesthetic).	100.8	3.15	1.05	96	3	1	-	-	-	-	-	-	-	-	-
Deligiannidi	2015	Greece	2014	Journal	Teachers (mixed)	-	N	-	Y	Y	Y	Y	Y	Y	Y	N	Y	Y	N	N	Y	Y	Y	N	N	Y	Y	Con	-	217	217	15.1	-	Individuals learn better when they receive information in their preferred learning style (e.g. visual, auditory, kinesthetic)	210.49	0	6.51	97	0	3	-	-	-	-	-	-	-	-	-
Dundar	2016	Turkey	2016	Journal	Pre-service teachers	-	N	-	Y	Y	Y	Y	Y	Y	Y	N	Y	Y	N	N	Y	Y	Y	Y	N	Y	Y	Con	-	2932	2932	0	-	Individuals learn better when they receive information in their preferred learning style (e.g., auditory, visual, kinesthetic).	2861.63	32.252	38.116	97.6	1.1	1.3	-	-	-	-	-	-	-	-	-
Ferrero	2016	Spain	2015	Journal	Teachers (mixed)	Grant AYD-000-235	N	Y	Y	Y	Y	Y	Y	Y	Y	N	Y	Y	N	N	Y	Y	N	Y	Y	Y	Y	Con	-	284	284	16.9	-	Individuals learn better when they receive information in their preferred learning style (e.g., auditory, visual, and kinesthetic).	258.724	13.916	8.804	91.1	4.9	3.1	-	-	-	-	-	-	-	-	-
Gleichgerrcht	2015	Argentina	2015	Journal	Teachers (mixed)	-	N	-	Y	Y	Y	Y	Y	Y	Y	N	Y	Y	N	N	Y	Y	N	Y	N	Y	Y	Unc	-	551	551	17.8	-	Individuals learn better when they receive information in their preferred learning style (e.g., auditory, visual, and kinesthetic)	472.758	-	-	85.8	-	-	-	-	-	-	-	-	-	-	-
Gleichgerrcht	2015	Latin America	2015	Journal	Teachers (mixed)	-	N	-	Y	Y	Y	Y	Y	Y	Y	N	Y	Y	N	N	Y	Y	N	Y	N	Y	Y	Unc	-	80	80	17.8	-	Individuals learn better when they receive information in their preferred learning style (e.g., auditory, visual, and kinesthetic)	68.96	-	-	86.2	-	-	-	-	-	-	-	-	-	-	-
Gleichgerrcht	2015	Peru	2015	Journal	Teachers (mixed)	-	N	-	Y	Y	Y	Y	Y	Y	Y	N	Y	Y	N	N	Y	Y	N	Y	N	Y	Y	Unc	-	2222	2222	17.8	-	Individuals learn better when they receive information in their preferred learning style (e.g., auditory, visual, and kinesthetic)	2013.13	-	-	90.6	-	-	-	-	-	-	-	-	-	-	-
Gleichgerrcht	2015	Chile	2015	Journal	Teachers (mixed)	-	N	-	Y	Y	Y	Y	Y	Y	Y	N	Y	Y	N	N	Y	Y	N	Y	N	Y	Y	Unc	-	598	598	17.8	-	Individuals learn better when they receive information in their preferred learning style (e.g., auditory, visual, and kinesthetic)	569.296	-	-	95.2	-	-	-	-	-	-	-	-	-	-	-
Grospietsch	2019	Germany	2018	Journal	Pre-service teachers	Qualitätsoffensive Lehrerbildung	N	Y	Y	Y	Y	Y	Y	Y	Y	N	Y	Y	N	N	Y	Y	N	Y	Y	Y	Y	Con	-	550	550	0	-	Individuals learn better when they receive information in their preferred learning style (e.g., auditory, visual, and kinesthetic)	511.5	-	-	93	-	-	-	-	-	-	-	-	-	-	-
Grospietsch	2017	Germany	2017	Journal	Pre-service teachers	Qualitätsoffensive Lehrerbildung	N	-	Y	Y	Y	Y	Y	Y	Y	Y	Y	Y	N	N	Y	Y	N	Y	Y	Y	Y	Con	-	57	57	0	-	(cites Dekker paper as source)	54.15	-	-	95	-	-	Yes	40	15.2	-	-	38	-	-	-
Hermosilla	2016	Chile	2016	Thesis	Pre-service teachers	-	N	Y	Y	Y	Y	Y	Y	Y	Y	N	Y	Y	N	N	Y	Y	N	Y	N	N	N	Con	-	184	184	0	-	Individuals learn better when they receive information in their preferred learning style (e.g., auditory, visual, and kinesthetic).	175.904	-	-	95.6	-	-	-	-	-	-	-	-	-	-	-
Horvath	2018	UK, USA, Australia	2018	Journal	Teachers	ARC-SRI:	N	-	Y	Y	Y	Y	Y	Y	Y	N	Y	Y	N	N	Y	Y	N	Y	Y	Y	Y	Con	73	50	50	18.56	68.4932	Individuals learn better when they receive information in their preferred learning style (e.g., auditory, visual, kinesthetic)	42	6	2	84	12	4	-	-	-	-	-	-	-	-	-
Howard-Jones	2009	UK	2009	Grey lit	Pre-service teachers	-	N	-	Y	Y	Y	Y	Y	Y	Y	Y	Y	Y	N	N	Y	Y	Y	N	N	N	N	Con	-	158	158	0	-	Individuals learn better when they receive information in their preferred learning style (e.g., auditory, visual, and kinesthetic).	129.56	11.06	17.38	82	7	11	-	-	-	-	-	-	-	-	-
Karakus	2014	Turkey	2014	Journal	Teachers (mixed)	-	N	-	Y	Y	Y	Y	Y	Y	Y	N	Y	Y	N	N	Y	Y	Y	Y	N	Y	Y	Con	-	278	278	-	-	Individuals learn better when they receive information in their preferred learning style (e.g.,auditory,visual,kinaesthetic). (Incorrect)	269.938	3.058	5.004	97.1	1.1	1.8	-	-	-	-	-	-	-	-	-
Kilpatrick	2012	USA	2012	Thesis	Teachers (Elementary School)	-	N	-	Y	Y	Y	Y	Y	Y	Y	N	Y	Y	N	N	Y	Y	N	Y	N	Y	Y	Con	360	70	70	13.36	19.4444	Students learn best when taught in a manner consistent with their learning styles	65	5	0	92.8571	7.14286	0	-	-	-	-	-	-	-	-	Yes
Kim	2017	Australia	2015	Journal	Pre-service teachers	None, Brain Quiz	N	-	Y	Y	Y	Y	Y	Y	Y	Y	Y	Y	N	N	Y	Y	N	Y	Y	Y	Y	Con	-	1144	1144	0	-	Individuals learn better when they receive information in their preferred learning style (e.g. auditory, visual, kinaesthetic).	1110.82	32.032	1.144	97.1	2.8	0.1	-	-	-	-	-	-	-	-	-
Lethaby	2015	North America	2015	Journal	Teachers (TESOL)	-	N	-	Y	Y	Y	Y	Y	Y	Y	Y	Y	Y	N	N	Y	Y	N	N	N	N	N	Con	-	128	128	-	-	Individuals learn better when they receive information in their preferred learning style (e.g. visual, auditory, kinaesthetic).	113	10	5	88.28	3.91	7.81	-	-	-	-	-	-	-	-	-
Macdonald	2017	USA	2014	Journal	Teachers (mixed)	Faculty research support grant	N	-	Y	Y	Y	Y	Y	Y	Y	Y	Y	Y	N	N	Y	Y	N	Y	Y	Y	Y	Con	-	3877	598	-	-	Individuals learn better when they receive information in their preferred learning style	454.48	-	-	76	-	-	-	-	-	-	-	-	-	-	-
McMahon	2019	UK	2015	Journal	Pre-service teachers	Wellcome Trust	N	-	Y	Y	Y	Y	Y	Y	Y	Y	Y	Y	N	N	Y	Y	Y	Y	Y	Y	Y	Con	340	298	130	-	38.2353	Individuals learn better when they receive information in their preferred learning style (e.g., auditory, visual, kinaesthetic).	112.84	11	6	86.8	10.1	3.1	Yes	130	82.03	33.93	14.04	63.1	26.1	10.8	-
Menz	2020	Germany	2017	Journal	Pre-service teachers	Ministerium für Wissenschaft and German Federal Government	N	Y	Y	Y	Y	Y	Y	Y	Y	Y	Y	Y	N	N	Y	Y	Y	Y	Y	Y	Y	Sno		937	936	0	-	How much do you agree with the thesis that there are different learning styles (e.g., auditory, visual or kinesthetic) that enable more effective learning?	890	22	24	95	2.3	2.6	-	-	-	-	-	-	-	-	-
Morehead	2015	USA	2015	Journal	Higher Education	National Science Foundation Graduate Research Fellowship Program	N	Y	Y	Y	Y	Y	Y	Y	Y	N	Y	Y	N	N	Y	Y	N	N	Y	N	N	Con	-	146	146	0	-	-	-	-	-	-	-	-	-	-	-	-	-	-	-	-	-
Newton	2016	UK	2016	Journal	Higher Education	-	N	Y	Y	Y	Y	Y	Y	Y	Y	N	Y	Y	Y	Y	Y	Y	Y	Y	N	Y	Y	Con	-	161	114	11	-	Individuals learn better when they receive information in their preferred Learning Style(e.g., auditory, visual, kinaesthetic)	66.12	-	-	58	-	-	Yes	114	36.024	50.046	26.904	31.6	43.9	23.6	Yes
Papadatou-Pastou	2017	Greece	2016	Journal	Pre-service teachers	-	N	-	Y	Y	Y	Y	Y	Y	Y	N	Y	Y	N	N	Y	Y	N	Y	N	Y	Y	Con	-	-	571	0	-	Individuals learn better when they receive information in their preferred learning style (e.g., auditory, visual, kinesthetic)	539.024	21.127	10.849	94.4	3.7	1.9	-	-	-	-	-	-	-	-	-
Pei	2015	East China	2015	Journal	Teachers (mixed)	-	N	-	Y	Y	Y	Y	Y	Y	Y	N	Y	Y	N	N	Y	Y	Y	N	N	N	N	Con	-	238	238	-	-	Individuals learn better when they receive information in their preferred learning style (e.g. visual, auditory, kinaesthetic)	230.86	2.38	7.14	97	1	3	-	-	-	-	-	-	-	-	-
Piza	2019	USA	2017	Journal	Higher Education	-	N	-	Y	Y	Y	Y	Y	Y	Y	N	Y	Y	N	N	Y	Y	Y	Y	N	Y	Y	Con	1042	205	156	-	14.9712	-	-	-	-	-	-	-	-	-	-	-	-	-	-	-	Yes
Ruhaak	2018	USA	2018	Journal	Pre-service teachers	-	N	-	Y	Y	Y	Y	Y	Y	Y	N	Y	Y	N	N	Y	Y	N	Y	N	Y	Y	Con	-	129	129	0	-	Individuals learn better when they receive information in their preferred learning style.	99.33	19.479	10.191	77	15.1	7.9	-	-	-	-	-	-	-	-	Yes
Sarrasin	2019	Quebec	2019	Journal	Teachers (mixed)	EREST of UQAM	N	-	Y	Y	Y	Y	Y	Y	Y	N	Y	Y	N	N	Y	Y	N	Y	Y	Y	Y	Con	-	972	972	4	-	Individuals learn better when they receive information in their preferred Learning Style(e.g., auditory, visual, kinaesthetic)	719.28	184.68	68.04	74	19	7	-	-	-	-	-	-	-	-	-
Sparks	2018	USA	2016	Thesis	Pre-service teachers	-	N	-	Y	Y	Y	Y	Y	Y	Y	Y	Y	Y	N	N	Y	Y	N	N	N	N	N	Con	-	87	84	0	-	Individuals learn better when they receive information in their preferred learning style (e.g., auditory, visual, kinesthetic).	68.88	15.12	0	82	18	0	Yes	86	4	-	-	10	90	-	-
Tardif	2015	Switzerland	2015	Journal	Teachers and Pre-service Teachers	-	N	-	Y	Y	Y	Y	Y	Y	Y	N	Y	Y	N	N	Y	Y	N	N	N	Y	Y	Con	-	283	274	-	-	A pedagogical approach based on such a distinction favors learning	238	-	-	87	-	-	-	-	-	-	-	-	-	-	Yes
van Dijk	2018	USA	2018	Journal	Teachers and Pre-service Teachers	-	N	-	Y	Y	Y	Y	Y	Y	Y	N	Y	Y	N	N	Y	Y	Y	N	N	N	N	Sno	-	213	169	-	-	In general, students learn better when information is presented in their preferred learning style (e.g., auditory, visual, tactile, and kinesthetic).*	106.47	40.56	20.28	63	24	12	-	-	-	-	-	-	-	-	-
Yoon	2018	South Korea	2017	Thesis	Pre-service teachers	-	N	Y	Y	Y	Y	Y	Y	Y	Y	Y	Y	Y	N	N	Y	Y	N	N	N	N	N	Con	-	342	132	0	-	“Individuals learn better when they receive information in their preferred learning style (e.g., auditory, visual, kinesthetic)	127.908	3.036	1.056	96.9	2.3	0.8	-	-	-	-	-	-	-	-	-
Zhang	2019	China	2019	Journal	Teachers (Headmasters)	-	N	-	Y	Y	Y	Y	Y	Y	Y	N	Y	Y	N	N	Y	Y	N	Y	N	Y	Y	Con	-	251	251	18.77	-	Individuals learn better when they receive information in their preferred learning style	234.936	16.064	-	93.6	6.4	-	-	-	-	-	-	-	-	-	-
[truncated: 16 more columns]

## Sheet: Instructions
Year Undertaken		The date reported in the methods. If this is a range then record the year which fills most of the range (e.g. Nov 2017-Jan 2018 would be 2017. if the split is equal (e.g. Nov 2017-Feb 2018) then record the first of the years. If no date is given in the methods then check the article details (most papers report, on the first page, the date the paper was submitted -take that year)
Publication type	drop down menu with free text 'other' option	Journal Article, Thesis, Grey Literature
Population	drop down menu	What type of educator (e.g. school teacher, preservice teacher, preservice AND qualified teacher, Uni academic, other (please state)
Funding		Was any funding received to undertake the study, if so who was it from? Answer with either 'No' or name the funder with a hyperlink to a grant page if possible.
CoI	Yes/No/Not clear (with optional comments)	Was there any obvious Conflict of Interest. This may be declared in the paper, or implied, for example, did the researchers have a commercial interest in a company that delivers training in the use of, or the debunking of, Learning Styles
Neutral invitation?	Yes/No/Not stated (with optional comments)	for example does the invitation to participants to participate in a 'study of neuromyths' (in which case answer 'no', or a 'study of facts about neuroscience and teaching' (in which case answer yes)
Sampling Method	Con/Sno/Unc	See text of manuscript
Target Population Number	Numerical entry with option for 'not stated'	the total number of participants in the population. For example if the study is surveying 'trainee teachers in Morocco', does the paper state how many trainee teachers are in Morocco
Sampled	Numerical entry with option for 'not stated'	the number of participants who were invited to complete the survey
N	Numerical entry with option for 'not stated'	the number of participants who completed the question(s) about Learning Styles
Ave teaching exp	Numerical entry with option for 'not stated'	the average number of years of teaching experience of the participants who answered the questions about Learning Styles
Response Rate	%	% of responses from the overall population (target population/n)
specific question asked (belief in learning styles)	free text entry	the specific question asked about whether participants believe that matching instruction to 'learning styles' will improve outcomes for learners
# incorrect	Numerical entry with option for 'not stated'	the number (not percentage) of participants who respond that they believe in matching instruction to learning styles
# correct	Numerical entry with option for 'not stated'	the number (not percentage) of participants who respond that they do not believe in matching instruction to learning styles
# Don't know/neutral	Numerical entry with option for 'not stated'
% incorrect	Numerical entry with option for 'not stated'	the percentage (not number) of participants who respond that they believe in matching instruction to learning styles
correct	Numerical entry with option for 'not stated'	the percentage (not number) of participants who respond that they do not believe in matching instruction to learning styles
Don't know/neutral	Numerical entry with option for 'not stated'	the percentage (not number) of participants who responded with don'tknow/neutral to matching instrcutions to learning styles question
Training?	Y/N	Was any training or other intervention given to educate participants about the evidence base for Learning Styles (training had to be given after participants were asked about their initial belief in matching instruction)
# incorrect (post)		the number (not percentage) of participants who respond that they believe in matching instruction to learning styles after training
# correct (post)	Numerical entry with option for 'N/A'	the number (not percentage) of participants who respond that they do not believe in matching instruction to learning styles after training
# Don't know/neutral (post)	Numerical entry with option for 'N/A'
% incorrect (post)	Numerical entry with option for 'N/A'
% correct (post)	Numerical entry with option for 'N/A'	the percentage (not number) of participants who respond that they believe in matching instruction to learning styles after training
% don't know (post)	Numerical entry with option for 'N/A'	the percentage (not number) of participants who respond that they do not believe in matching instruction to learning styles after training
Use Learning Styles	Numerical entry with option for 'N/A'	were participants asked whether they used Learning Styles in their teaching. This must, specifically, be a matching of instruction to learning styles
Use Learning Styles (question)	Yes/No	what specific question were the participants asked about use of learning styles
N (use)	free text entry	What was the number of participants who were asked the question about 'use'
Yes (N)	Numerical entry with option for 'N/A'	the number (not percentage) who answered yes to the question about use of learning styles
No (N)		the number (not percentage) who answered no, that they do not use learning styles
Yes (%)		the percentage (not number) who answered yes to the question about use of learning styles
No (%)		the percentage (not number) who answered no, that they do not use learning styles
Justification of research method	Y/N	Was justification given for why the research was conducted?
Background literature review	Y/N	Was a background literature review included in the survey to say where the information was taken from (most cases Dekker)
Explicit research question	Y/N	Was a explicit research question asked and can this be seen in the study (neuromyths in trainee teachers/teachers/colleges)
Clear Study Objectives	Y/N	Were clear Study objectives outlined in the study (Has neuromyths belief increased/declined over time or what is belief in neuromyths)
Description of methods used for data analysis	Y/N	Methods used to analyse the data (types of questions asked)
Method of questionnaire administration	Y/N	Is it described how the questionnaire was administered (e.g. pen and paper, online)
Location of data collection	Y/N	Where was the data collected (normally written Country)
Dates of data collection	Y/N	Does the text of the paper state the date of Data collection? If ‘N’ then, for analysis purposes this information was derived from the paper was submitted (if given) or published
Methods sufficiently described for replication	Y/N	Is the method sufficiently described to be repeated by someone else
Evidence of validity	Y/N	Is the research done valid (Has it been described what steps or methods were taken to ensure the validity of the study instrument)
Methods for verifying data entry	Y/N	Are the results double checked before inputting/if data is wrong, was it removed/discarded
Description of Research tool	Y/N	Tool used to undertake research.
Instrument pre testing	Y/N	Was the questionnaire/ test checked before being sent out/released to study participants
Consent	Y/N	Was Consent approved by the individual before undertaking the study
Sponsorship	Y/N	If sponsorship was received, is it stated from where
Research ethics approval	Y/N	Was the study ethically approved
Evidence of ethical treatment of human subjects	Y/N	Evidence to show that ethical treatment of the human subjects was conducted, was a follow up done to check on individuals?
Validity 1	Y/N	Was sufficient information made available to participants for them to be clear that they were being asked about Learning Styles rather than styles of learning, or preferences (cite papa 2020). For example, was it explained that, in order to diagnose a Learning Style, a questionnaire needs to be administered which then results in learners being allocated to one or more styles (e.g. Newton and Miah…
Validity 2	Y/N	If yes to above, was it also made clear that educators are supposed to tailor instruction to individual Learning Styles.
specific question asked (Preference in learning styles)	free text entry	the specific question asked about whether participants have believe that people have a prefrence towards a learning style that they use to learn with
# incorrect	Numerical entry with option for 'not stated'	the number (not percentage) of participants who respond that they believe in matching instruction to learning styles
# correct	Numerical entry with option for 'not stated'	the number (not percentage) of participants who respond that they do not believe in matching instruction to learning styles
# Don't know/neutral	Numerical entry with option for 'not stated'
% incorrect	Numerical entry with option for 'not stated'	the percentage (not number) of participants who respond that they believe in matching instruction to learning styles
correct	Numerical entry with option for 'not stated'	the percentage (not number) of participants who respond that they do not believe in matching instruction to learning styles
Don't know/neutral	Numerical entry with option for 'not stated'	The percentage (not number) of participants who responded they did not know/neutral for question on prefrence of learning styles
N(traning)	Numerical entry with option for 'not stated'	The number of participants that undewent training
#Don't know/neutral	Numerical entry with option for 'not stated'	The number (not percentage) of participants that answered Don't know to using learning styles
%Don't know/neutral	Numerical entry with option for 'N/A'	the percentage (not number) of participants who responded they do not know/neutral to question on using learning styles
specific question asked (Preference in learning styles)	free text entry	Is a specific question asked about belief in preferences						If the answer is yes then repeat 13-18 questions AGAIN
